# Supplementary material
Source: publisher site journal article supplement (https://www.spandidos-publications.com/3455/downloadSupplementary)
Supplement: Supplementary file 1 [file downloadSupplementary]

## Sheet: Sheet1
Table S1. List of the genes significantly co-expressed with FHOD1 (criteria: |r|≥0.25; q-value< 1.00E-4)
Gene symbol	Cytoband	Spearman's Correlation	P-value	q-Value
SLC9A5	16q22.1	0.474925	1.43989e-24	2.73824e-20
EDC4	16q22.1	0.399042	3.52559e-17	3.04207e-13
EXOC3L1	16q22.1	0.397314	4.95022e-17	3.04207e-13
COL5A3	19p13.2	0.396001	6.39863e-17	3.04207e-13
TAF1C	16q24.1	0.389018	2.45793e-16	9.34849e-13
DHX38	16q22.2	0.375739	2.91173e-15	9.22874e-12
COLGALT1	19p13.11	0.366143	1.6219e-14	4.40623e-11
ATP13A1	19p13.11	0.36083	4.09601e-14	9.73674e-11
COL13A1	10q22.1	0.349264	3.60195e-12	3.60517e-09
E2F4	16q22.1	0.346587	4.51436e-13	9.53885e-10
CPSF1	8q24.3	0.345873	5.07568e-13	9.65243e-10
RANBP10	16q22.1	0.341578	1.02044e-12	1.52163e-09
SLC7A6	16q22.1	0.340669	1.18139e-12	1.52163e-09
TBCD	17q25.3	0.340571	1.20022e-12	1.52163e-09
C1QTNF6	22q12.3	0.337407	1.99035e-12	2.25793e-09
ELFN1	7p22.3	0.336845	2.17624e-12	2.2992e-09
CAD	2p23.3	0.332219	4.50558e-12	4.28413e-09
ATP13A2	1p36.13	0.328161	8.44581e-12	7.30063e-09
VAC14	16q22.1-q22.2	0.327547	9.28053e-12	7.67339e-09
FCSK	16q22.1	0.324491	1.47904e-11	1.13549e-08
DUS2	16q22.1	0.32443	1.49273e-11	1.13549e-08
RFWD3	16q23.1	0.321674	2.26212e-11	1.59329e-08
GIT1	17q11.2	0.321069	2.47691e-11	1.68226e-08
SCARF1	17p13.3	0.317741	4.06461e-11	2.49344e-08
WWP2	16q22.1	0.315648	5.53286e-11	3.28808e-08
PCDH12	5q31.3	0.315046	6.0436e-11	3.48276e-08
AMPD2	1p13.3	0.31473	6.32931e-11	3.54013e-08
FLT4	5q35.3	0.311973	9.45338e-11	5.13643e-08
PKN3	9q34.11	0.31048	1.17273e-10	6.02753e-08
CORO7	16p13.3	0.308464	1.56599e-10	7.61287e-08
EPHB4	7q22.1	0.308161	1.63507e-10	7.61287e-08
PIEZO1	16q24.3	0.308099	1.64979e-10	7.61287e-08
ADAM12	10q26.2	0.307966	1.68134e-10	7.61287e-08
RELT	11q13.4	0.303287	3.2573e-10	1.31796e-07
BMP1	8p21.3	0.300875	4.55918e-10	1.80629e-07
ADAMTS4	1q23.3	0.30039	4.87654e-10	1.86535e-07
PRMT7	16q22.1	0.300349	4.90444e-10	1.86535e-07
ADAMTS7	15q25.1	0.300162	5.03323e-10	1.8768e-07
CETP	16q13	0.299563	5.46796e-10	1.9997e-07
DOCK6	19p13.2	0.298698	6.16058e-10	2.14601e-07
FANCA	16q24.3	0.298644	6.20658e-10	2.14601e-07
ZNF598	16p13.3	0.298195	6.60157e-10	2.24182e-07
SF3B3	16q22.1	0.294349	1.11541e-09	3.6572e-07
MMP15	16q21	0.293449	1.25953e-09	3.99483e-07
RASSF1	3p21.31	0.293387	1.27016e-09	3.99483e-07
COL18A1	21q22.3	0.293322	1.2814e-09	3.99483e-07
NID2	14q22.1	0.292764	1.38138e-09	4.23705e-07
SNAPC4	9q34.3	0.290435	1.88704e-09	5.43724e-07
LAMB1	7q31.1	0.29008	1.97834e-09	5.61524e-07
KATNB1	16q21	0.289669	2.0895e-09	5.84354e-07
ADCY3	2p23.3	0.288034	2.59494e-09	7.15188e-07
ADAMTS2	5q35.3	0.287877	2.64914e-09	7.19695e-07
GMIP	19p13.11	0.287192	2.89976e-09	7.76685e-07
ADAT1	16q23.1	0.286837	3.03821e-09	8.02467e-07
C16ORF70	16q22.1	0.285454	3.64227e-09	9.48837e-07
CAPN15	16p13.3	0.285278	3.72705e-09	9.57801e-07
MAST3	19p13.11	0.28507	3.82957e-09	9.71026e-07
CUL7	6p21.1	0.284014	4.39416e-09	1.09952e-06
PODXL	7q32.3	0.283854	4.4867e-09	1.1081e-06
MAN1B1	9q34.3	0.283169	4.9039e-09	1.16912e-06
KDR	4q12	0.283122	4.93364e-09	1.16912e-06
MAPKAPK2	1q32.1	0.28305	4.97968e-09	1.16912e-06
CEP85	1p36.11	0.282849	5.11136e-09	1.1854e-06
ADAMTS12	5p13.3-p13.2	0.282557	2.70072e-08	3.95074e-06
MCM3AP	21q22.3	0.282155	5.59037e-09	1.28087e-06
LIPG	18q21.1	0.281876	5.79532e-09	1.31202e-06
NPHP4	1p36.31	0.28136	6.19345e-09	1.36954e-06
UBE2O	17q25.1	0.281169	6.34757e-09	1.37272e-06
GATAD2A	19p13.11	0.281163	6.35219e-09	1.37272e-06
GRK2	11q13.2	0.280729	6.71639e-09	1.41917e-06
CNTROB	17p13.1	0.279977	7.39569e-09	1.54554e-06
SLC19A1	21q22.3	0.279458	7.90285e-09	1.616e-06
NOTCH4	6p21.32	0.279203	8.16438e-09	1.64294e-06
ABCD4	14q24.3	0.279162	8.20737e-09	1.64294e-06
MYH9	22q12.3	0.278409	9.03274e-09	1.75281e-06
ACAN	15q26.1	0.277598	1.0012e-08	1.92322e-06
WDR90	16p13.3	0.277325	1.03651e-08	1.97114e-06
TANGO6	16q22.1	0.276446	1.15821e-08	2.18076e-06
LOXL2	8p21.3	0.276334	1.17469e-08	2.19011e-06
CXXC1	18q21.1	0.275789	1.2582e-08	2.31774e-06
LIMK1	7q11.23	0.274963	1.39563e-08	2.43492e-06
CHPF2	7q36.1	0.274888	1.40887e-08	2.43568e-06
ELMO3	16q22.1	0.274311	1.51446e-08	2.59464e-06
ZC3H18	16q24.2	0.273293	1.71964e-08	2.82478e-06
COL1A1	17q21.33	0.272921	1.80108e-08	2.92745e-06
NLRC5	16q13	0.272529	1.89096e-08	3.04749e-06
MAP1S	19p13.11	0.272085	1.99795e-08	3.19285e-06
GTPBP3	19p13.11	0.271943	2.03358e-08	3.19717e-06
DNMT1	19p13.2	0.27194	2.03427e-08	3.19717e-06
PWP2	21q22.3	0.271296	2.20296e-08	3.43391e-06
WDR59	16q23.1	0.271007	2.28302e-08	3.50131e-06
TAOK2	16p11.2	0.270847	2.32841e-08	3.52477e-06
HMGXB3	5q32	0.270763	2.35286e-08	3.52477e-06
SETD1A	16p11.2	0.270423	2.45341e-08	3.61678e-06
ADAMTS14	10q22.1	0.26942	2.77497e-08	3.99786e-06
PLXND1	3q22.1	0.269357	2.79672e-08	3.99888e-06
ROBO4	11q24.2	0.268973	2.93121e-08	4.15991e-06
CEP131	17q25.3	0.268771	3.00447e-08	4.23229e-06
ODF2	9q34.11	0.268511	3.10178e-08	4.33724e-06
WDR81	17p13.3	0.268362	3.15871e-08	4.38461e-06
MYH13	17p13.1	0.267555	1.4963e-07	1.44867e-05
TYK2	19p13.2	0.266933	3.75864e-08	5.10558e-06
GPR4	19q13.32	0.265945	4.23644e-08	5.59475e-06
XRCC3	14q32.33	0.265367	4.54248e-08	5.91674e-06
ADPGK	15q24.1	0.265034	4.72859e-08	6.11726e-06
ZNF276	16q24.3	0.264336	5.14263e-08	6.43907e-06
CDH24	14q11.2	0.26433	5.14665e-08	6.43907e-06
MON1B	16q23.1	0.263865	5.44167e-08	6.71976e-06
STK10	5q35.1	0.26356	5.64372e-08	6.87991e-06
PPP1R9B	17q21.33	0.263476	5.70084e-08	6.90528e-06
GGA1	22q13.1	0.263118	5.95053e-08	7.07258e-06
TELO2	16p13.3	0.262646	6.29503e-08	7.41876e-06
PPM1F	22q11.22	0.262613	6.31981e-08	7.41876e-06
RPS6KA1	1p36.11	0.262519	6.39118e-08	7.4565e-06
SLC38A7	16q21	0.262345	6.52517e-08	7.56641e-06
TONSL	8q24.3	0.262289	6.56864e-08	7.57066e-06
FAAP100	17q25.3	0.261439	7.26712e-08	8.27538e-06
EGFL6	Xp22.2	0.261335	2.9529e-07	2.38206e-05
XPO6	16p12.1	0.260403	8.21579e-08	9.062e-06
PDP2	16q22.1	0.260387	8.23095e-08	9.062e-06
ST3GAL2	16q22.1	0.260374	8.24382e-08	9.062e-06
FBXL8	16q22.1	0.260293	8.32237e-08	9.09578e-06
TBC1D24	16p13.3	0.260125	8.48956e-08	9.17306e-06
MICAL1	6q21	0.259944	8.67296e-08	9.31828e-06
PFKL	21q22.3	0.259882	8.73635e-08	9.33366e-06
NOS3	7q36.1	0.259514	9.12306e-08	9.69236e-06
CARD10	22q13.1	0.259387	9.26113e-08	9.78439e-06
FTSJ3	17q23.3	0.25892	9.7825e-08	1.02781e-05
DCLK3	3p22.2	0.258042	4.20306e-07	2.99362e-05
WDR62	19q13.12	0.257309	1.18119e-07	1.2208e-05
LIF	22q12.2	0.257215	1.19433e-07	1.22771e-05
GLG1	16q23.1	0.256956	1.23088e-07	1.25848e-05
GPR3	1p36.11	0.256831	1.24884e-07	1.27001e-05
BRF1	14q32.33	0.256551	1.29019e-07	1.29818e-05
PLOD1	1p36.22	0.256311	1.32679e-07	1.32797e-05
ZNF469	16q24.2	0.25608	1.36281e-07	1.34982e-05
SH3BP2	4p16.3	0.25595	1.3835e-07	1.36321e-05
TRIM65	17q25.1	0.255686	1.42643e-07	1.39827e-05
CD248	11q13.2	0.255248	1.5007e-07	1.44867e-05
BCAR1	16q23.1	0.25508	1.53012e-07	1.46961e-05
EGFLAM	5p13.2-p13.1	0.25496	1.55149e-07	1.47846e-05
INF2	14q32.33	0.254587	1.61957e-07	1.53231e-05
CHI3L1	1q32.1	0.25451	1.63398e-07	1.53829e-05
RNF40	16p11.2	0.253989	1.73503e-07	1.60951e-05
PARP10	8q24.3	0.253901	1.75263e-07	1.61795e-05
UBXN11	1p36.11	0.253237	1.89164e-07	1.73065e-05
SHCBP1	16q11.2	0.253027	1.93762e-07	1.75827e-05
TOP3B	22q11.22	0.25298	1.94818e-07	1.75827e-05
PLA2G15	16q22.1	0.251503	2.30586e-07	2.03011e-05
ANAPC2	9q34.3	0.251452	2.31934e-07	2.03257e-05
LIG1	19q13.33	0.251337	2.34991e-07	2.04056e-05
LUZP1	1p36.12	0.251267	2.36866e-07	2.04182e-05
CD300E	17q25.1	0.251251	2.37283e-07	2.04182e-05
MYO9B	19p13.11	0.251133	2.40504e-07	2.05097e-05
MYBBP1A	17p13.2	0.250524	2.5771e-07	2.16364e-05
STARD8	Xq13.1	0.250505	2.58267e-07	2.16364e-05
POLD1	19q13.33	0.250248	2.6589e-07	2.2075e-05
USB1	16q21	0.250192	2.67579e-07	2.2075e-05
MINK1	17p13.2	0.250173	2.68146e-07	2.2075e-05
NDUFB5	3q26.33	-0.250387	2.61736e-07	2.18309e-05
COX17	3q13.33	-0.250777	2.5041e-07	2.11647e-05
CWC15	11q21	-0.25088	2.47487e-07	2.1011e-05
SLC24A5	15q21.1	-0.251211	2.3838e-07	2.04202e-05
TCEAL8	Xq22.1	-0.251411	2.33009e-07	2.03263e-05
TMEM126A	11q14.1	-0.25215	2.14198e-07	1.8946e-05
TIPRL	1q24.2	-0.252669	2.01862e-07	1.80226e-05
MRPL33	2p23.2	-0.252893	1.96756e-07	1.76496e-05
TMOD1	9q22.33	-0.252968	1.95086e-07	1.75827e-05
CCDC181	1q24.2	-0.253231	1.89291e-07	1.73065e-05
COX20	1q44	-0.254243	1.68515e-07	1.5709e-05
SNX3	6q21	-0.254448	1.64585e-07	1.54183e-05
LAMTOR5	1p13.3	-0.254941	1.55488e-07	1.47846e-05
TRAPPC3	1p34.3	-0.255397	1.47501e-07	1.43848e-05
SPAG16	2q34	-0.256084	1.36218e-07	1.34982e-05
RAB5A	3p24.3	-0.257919	1.10007e-07	1.14317e-05
SEMA3E	7q21.11	-0.258096	4.17871e-07	2.98746e-05
STK33	11p15.4	-0.258694	1.00466e-07	1.04976e-05
RAB21	12q21.1	-0.260194	8.42022e-08	9.15013e-06
TCEAL9	Xq22.2	-0.260618	8.009e-08	8.95925e-06
BBIP1	10q25.2	-0.2611	7.56474e-08	8.51235e-06
UBE2B	5q31.1	-0.261285	7.401e-08	8.37767e-06
RTL8A	Xq26.3	-0.26193	6.85524e-08	7.85338e-06
ARL8B	3p26.1	-0.263302	5.82126e-08	6.96244e-06
FRG1	4q35.2	-0.263319	5.80933e-08	6.96244e-06
PRKAA2	1p32.2	-0.263737	5.52575e-08	6.77956e-06
HEBP2	6q24.1	-0.264086	5.29926e-08	6.58667e-06
CCDC90B	11q14.1	-0.264479	5.05509e-08	6.40885e-06
UBL5	19p13.2	-0.264599	4.98255e-08	6.35927e-06
ARPC3	12q24.11	-0.264671	4.93971e-08	6.34719e-06
FAXC	6q16.2	-0.264711	2.04613e-07	1.81828e-05
SELENOK	3p21.1	-0.265769	4.32752e-08	5.67562e-06
SPCS2P4	1p35.3	-0.266229	4.09336e-08	5.44359e-06
HSPB1P1	9q21.13	-0.266294	4.06134e-08	5.43905e-06
ZFAND6	15q25.1	-0.266668	3.88155e-08	5.23514e-06
ATP5F1E	20q13.32	-0.267346	3.57495e-08	4.891e-06
PIN4	Xq13.1	-0.268057	3.27835e-08	4.51771e-06
PAK5	20p12.2	-0.268977	1.27772e-07	1.29246e-05
LYPLAL1	1q41	-0.269421	2.77474e-08	3.99786e-06
THOC7	3p14.1	-0.270695	2.37246e-08	3.52477e-06
RPL32	3p25.2	-0.270725	2.36384e-08	3.52477e-06
SMIM26	20p11.23	-0.27103	2.27646e-08	3.50131e-06
AIG1	6q24.2	-0.273517	1.67225e-08	2.78957e-06
PYROXD1	12p12.1	-0.273602	1.6547e-08	2.78473e-06
ASB8	12q13.11	-0.27411	1.55305e-08	2.63699e-06
HIGD1A	3p22.1	-0.275049	1.38066e-08	2.43112e-06
CCDC91	12p11.22	-0.27518	1.35826e-08	2.41401e-06
MOB4	2q33.1	-0.275556	1.29562e-08	2.34656e-06
RPL24	3q12.3	-0.27573	1.26752e-08	2.31774e-06
MYEF2	15q21.1	-0.278912	8.4731e-09	1.66116e-06
VPS45	1q21.2	-0.278973	8.40742e-09	1.66116e-06
RPL27	17q21.31	-0.279588	7.77335e-09	1.6068e-06
COMMD6	13q22.2	-0.280734	6.71226e-09	1.41917e-06
C3ORF38	3p11.1	-0.281613	5.99509e-09	1.34128e-06
ETFRF1	12p12.1	-0.283739	4.55399e-09	1.1103e-06
PCDH20	13q21.2	-0.286352	1.72306e-08	2.82478e-06
SOX2	3q26.33	-0.28839	1.34979e-08	2.41401e-06
UBL3	13q12.3	-0.290545	1.85961e-09	5.43724e-07
COX14	12q13.12	-0.291771	1.57833e-09	4.68985e-07
HIKESHI	11q14.2	-0.292528	1.42591e-09	4.3042e-07
NDUFB4	3q13.33	-0.29578	9.1845e-10	3.06424e-07
VPS29	12q24.11	-0.298712	6.14808e-10	2.14601e-07
NACA	12q13.3	-0.305276	2.46244e-10	1.018e-07
DPH3	3p25.1	-0.305403	2.41881e-10	1.018e-07
RWDD1	6q22.1	-0.307155	1.88707e-10	8.15599e-08
MED21	12p11.23	-0.307325	1.84198e-10	8.14628e-08
SPCS2	11q13.4	-0.308299	1.60323e-10	7.61287e-08
EIF1B	3p22.1	-0.311717	9.81013e-11	5.1822e-08
UBE2E1	3p24.2	-0.319086	3.32963e-11	2.11065e-08
ZCRB1	12q12	-0.319793	2.99721e-11	1.96545e-08
DNAJC19	3q26.33	-0.32212	2.11578e-11	1.54753e-08
FAM104B	Xp11.21	-0.330091	6.27143e-12	5.67923e-09
WASHC3	12q23.2	-0.337319	2.01844e-12	2.25793e-09
TMBIM4	12q14.3	-0.340907	1.13709e-12	1.52163e-09
ATP5MG	11q23.3	-0.344039	6.84826e-13	1.18394e-09
